# Supplementary material
Source: publisher figshare collection journal article supplement (https://tandf.figshare.com/articles/dataset/_/11316209)
Supplement: Supplementary file 1 [file 1]

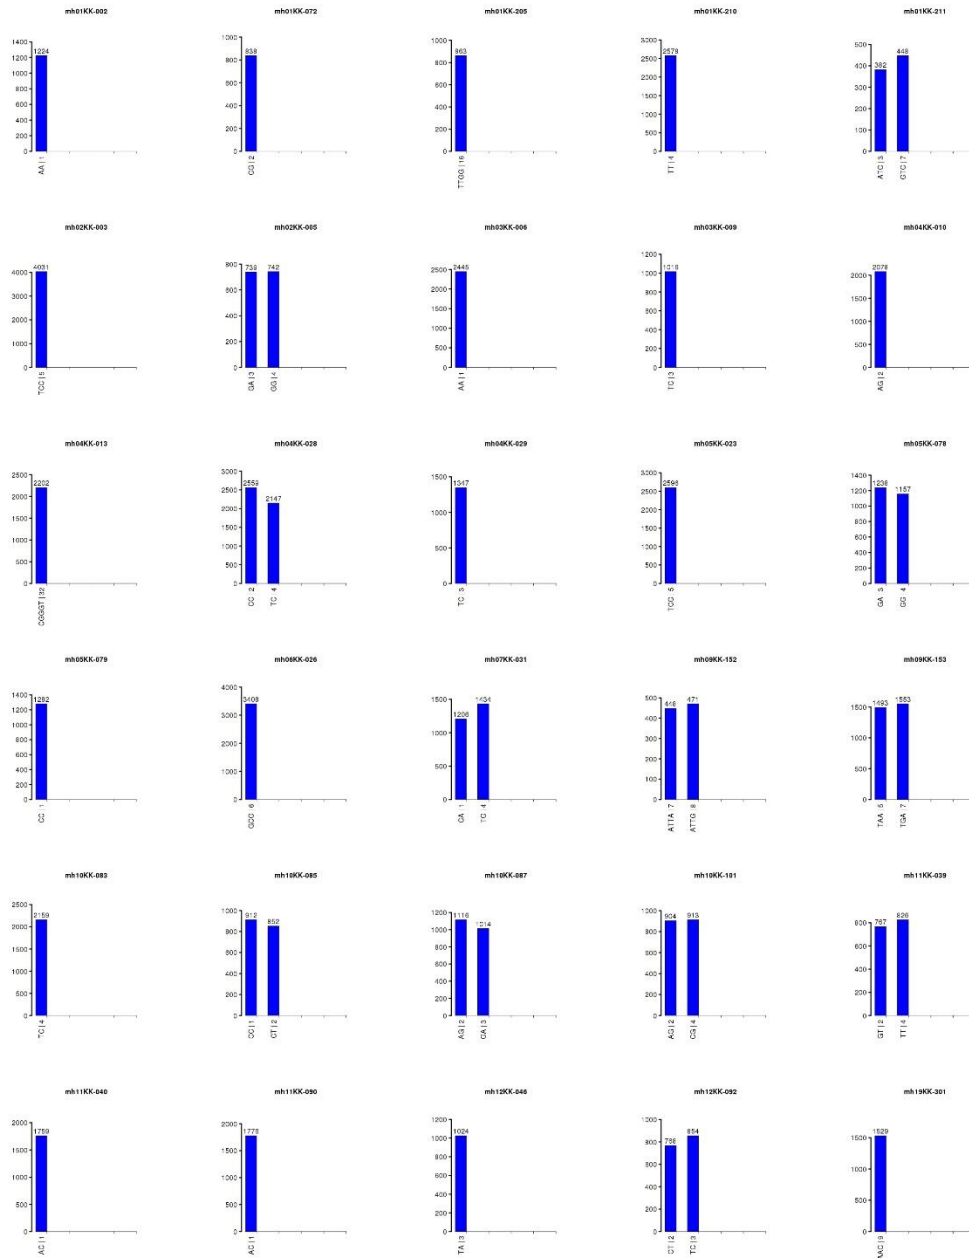

Supplementary Fig. S1. MHTyper-exported genotyping result for sample 1 at 30 microhaplotypes.

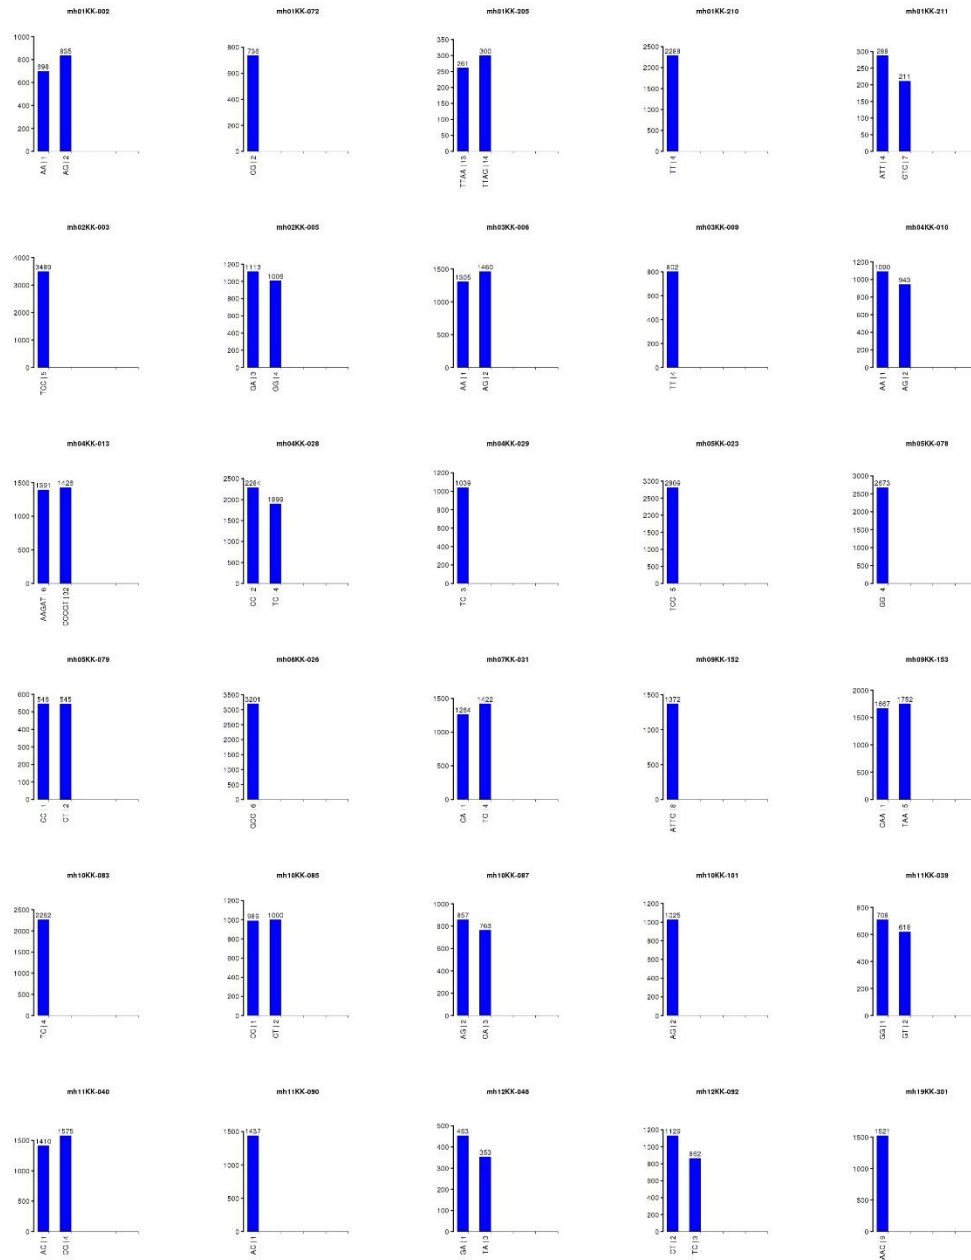

Supplementary Fig. S2. MHTyper-exported genotyping result for sample 2 at 30 microhaplotypes.

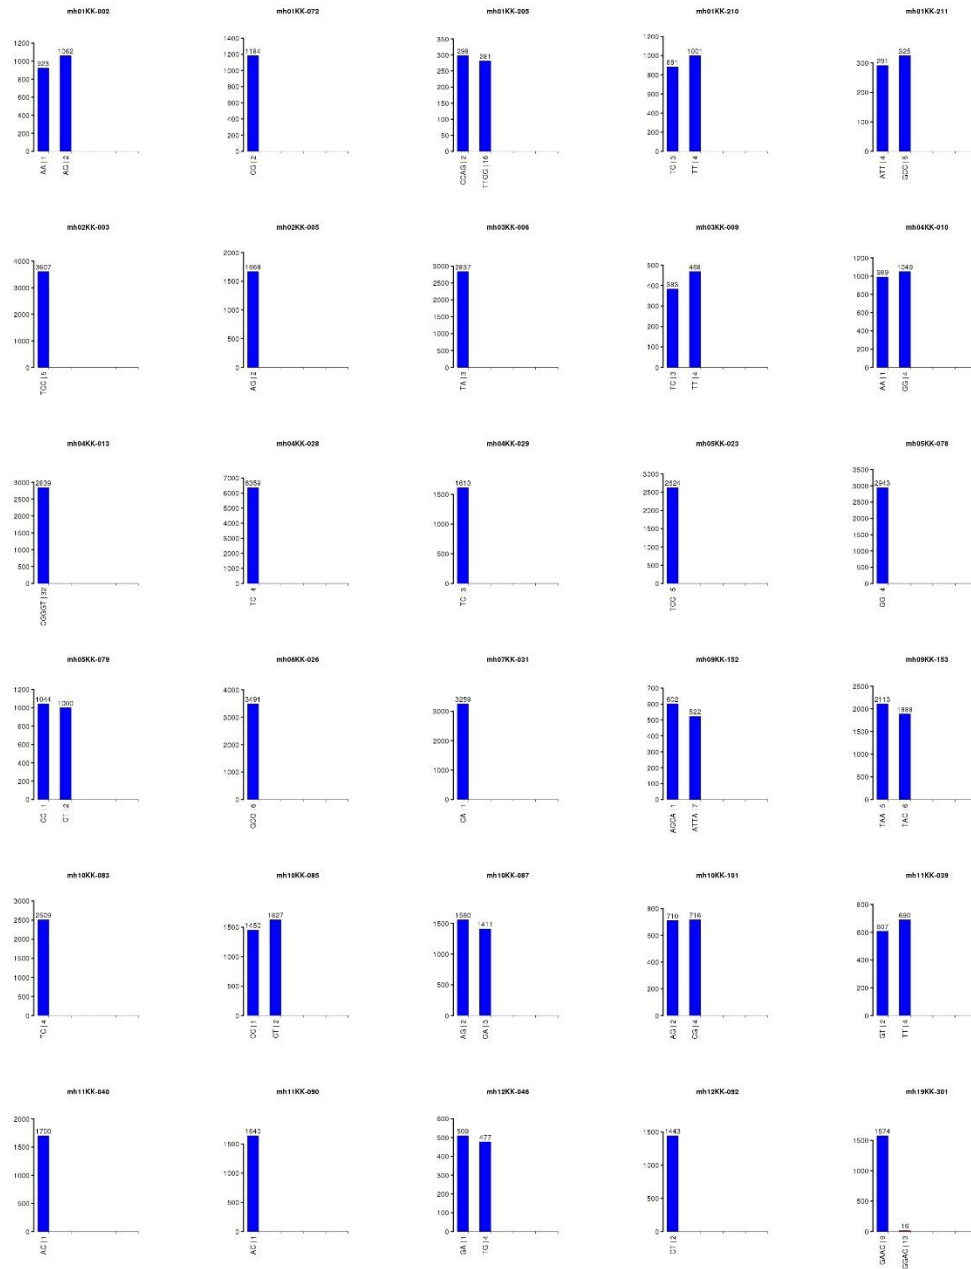

Supplementary Fig. S3. MHTyper-exported genotyping result for sample 3 at 30 microhaplotypes.

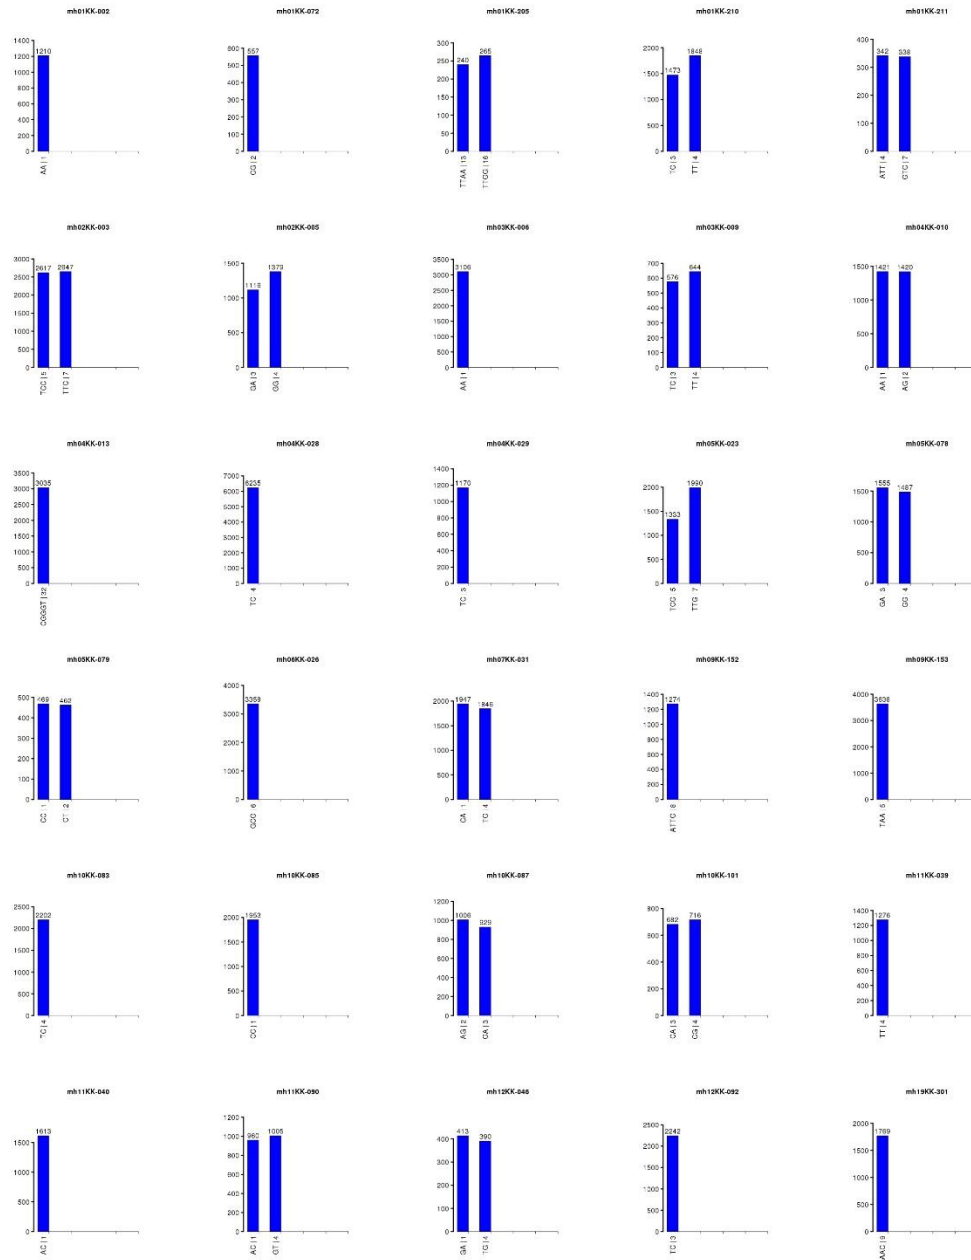

Supplementary Fig. S4. MHTyper-exported genotyping result for sample 4 at 30 microhaplotypes.

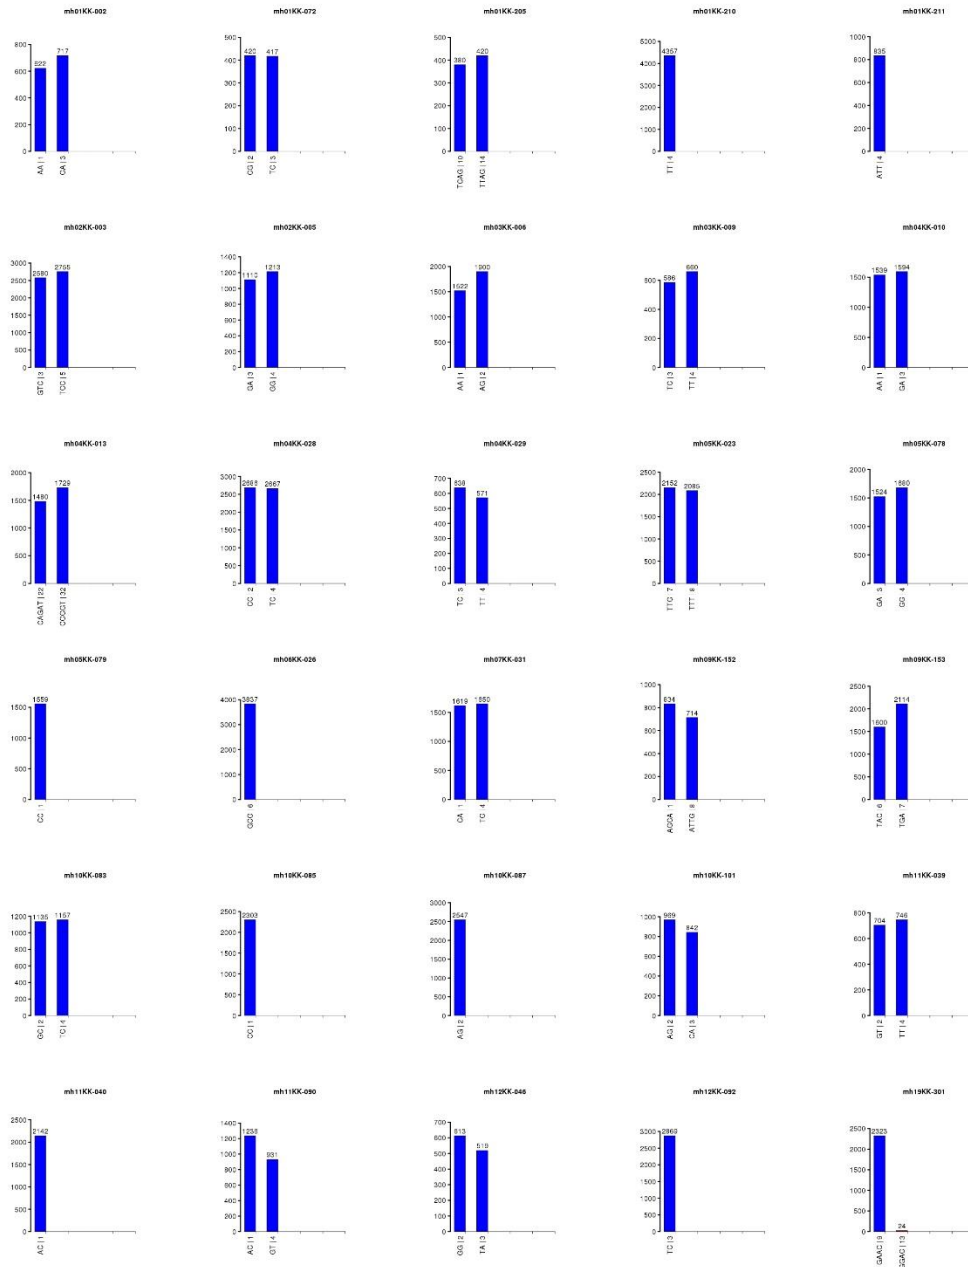

Supplementary Fig. S5. MHTyper-exported genotyping result for sample 5 at 30 microhaplotypes.
