# Supplementary material
Source: publisher figshare collection journal article supplement (https://tandf.figshare.com/articles/dataset/_/11316209)
Supplement: Supplementary file 2 [file 1]

Archive with 3 entries (3 files):
- tajf_a_1699956_sm5373.xlsx
- tajf_a_1699956_sm5372.xlsx
- tajf_a_1699956_sm5366.pdf
